# Supplementary material
Source: PubMed Central journal article supplement (PMC3586994)
Supplement: NIHMS359195-supplement-01.pdf [file NIHMS359195-supplement-01.pdf]

### Supplemental Materials

We report the complete results of the bootstrap resampling method for 11 neural regions of interest (4 are included in the manuscript and the other 7 are shown in the supplemental materials). The average time series plots for pre- (solid) and post-test (dashed) are drawn for the three practice groups. Black dashed lines at the bottom show the timing of antisaccade task blocks. Dark grey bands represent time points where attenuations at post-test were statistically significant and light grey bands represent time points where amplifications at post-test were statistically significant by the bootstrap resampling method. The 7 regions shown below are striatum, thalamus, middle occipital gyrus (MOG), inferior parietal lobe (IPL), right prefrontal cortex (rPFC), left prefrontal cortex (lPFC), and right inferior frontal cortex (rIFC).

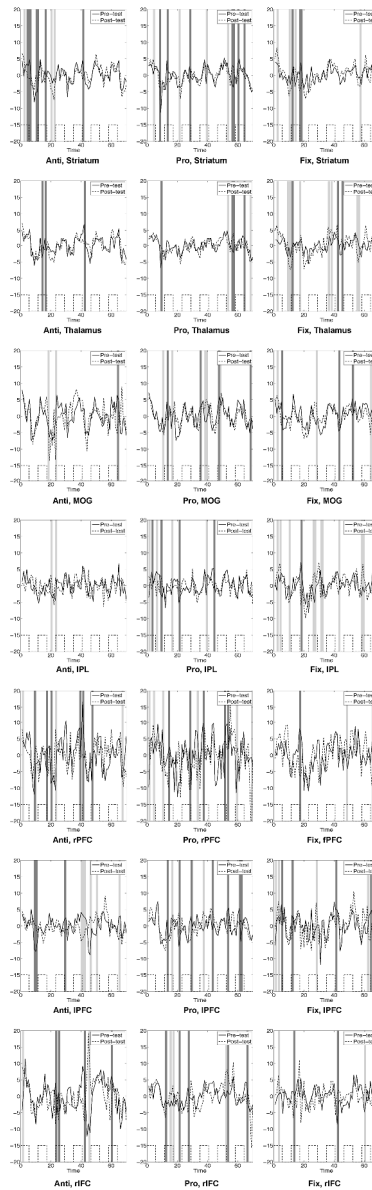

Supplementary Material Figures: The average time series plots for pre- (solid) and post-test (dashed) are drawn for the three practice groups. Black dashed lines at the bottom show the timing of antisaccade task blocks. Dark grey bands represent time points where attenuations at post-test were statistically significant and light grey bands represent time points where amplifications at post-test were statistically significant by the bootstrap resampling method. The areas shown are striatum, thalamus, middle occipital gyrus (MOG), inferior parietal lobe (IPL), right prefrontal cortex (rPFC), left prefrontal cortex (rPFC) and right inferior frontal cortex.

203x627mm (300 x 300 DPI)
